# Supplementary material
Source: PubMed Central journal article supplement (PMC2958696)
Supplement: NIHMS205460-supplement-Appendix.pdf [file NIHMS205460-supplement-Appendix.pdf]

## Appendix

### National Pension Policy Variables Used in Instrumental Variables Estimation

| Country        | Early (normal)<br>Retirement Age |         |
|----------------|----------------------------------|---------|
|                | Women                            | Men     |
| Sweden         | 61 (65)                          | 61 (65) |
| Denmark        | 60 (65)                          | 60 (65) |
| Germany        | 60 (65)                          | 60 (65) |
| Belgium        | 60 (63)                          | 60 (65) |
| Netherlands    | 60 (65)                          | 60 (65) |
| Austria        | 56 (60)                          | 61 (65) |
| Switzerland    | 62 (63)                          | 63 (65) |
| France         | 60 (60)                          | 60 (60) |
| Spain          | 60 (65)                          | 60 (65) |
| Italy          | 57 (60)                          | 57 (65) |
| Greece         | 55 (57)                          | 60 (62) |
| United Kingdom | 60 (60)                          | 65 (65) |
| United States  | 62 (65)                          | 62 (65) |

Source: *Pensions at a Glance* (OECD) and *Social Security Programs throughout the World: Europe, 2004*. (Social Security Administration, <http://www.ssaonline.us/policy/docs/progdesc/ssptw/2004-2005/europe/index.html>)
